# Supplementary material for: Exposure of Hydrophobic Surfaces Initiates Aggregation of Diverse ALS-Causing Superoxide Dismutase-1 Mutants
Source: PubMed Central journal article supplement (PMC2927901; doi:10.1016/j.jmb.2010.04.019), 2010-06-11

(a)

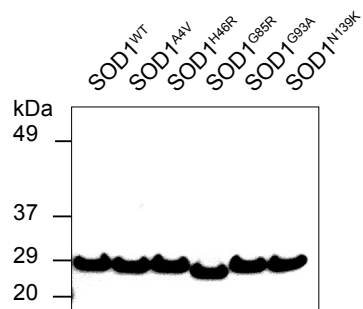

(b)

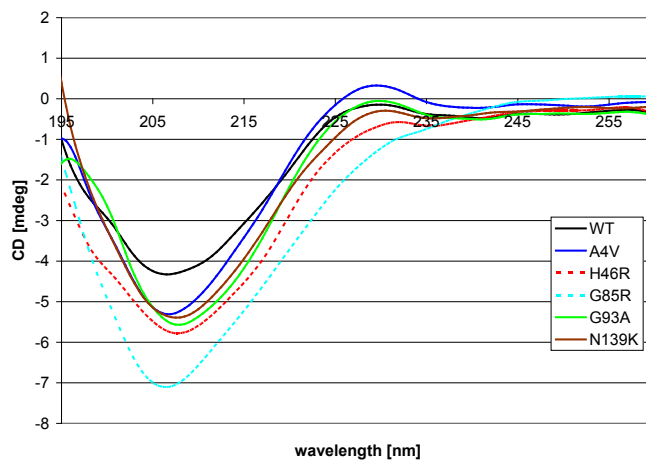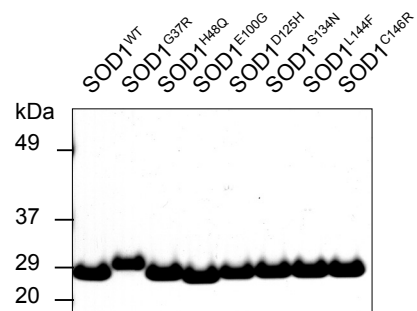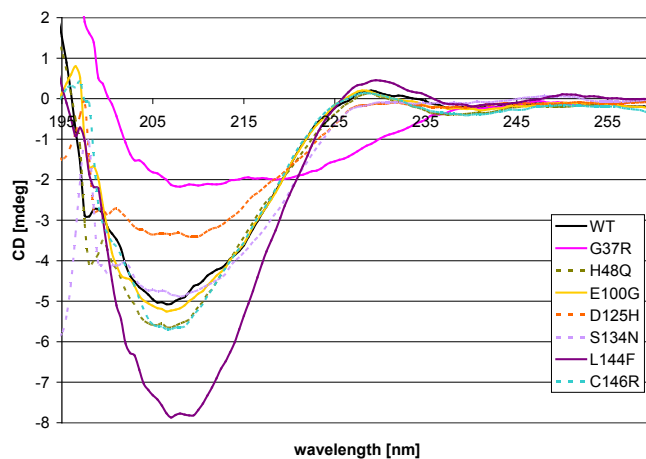

(a)

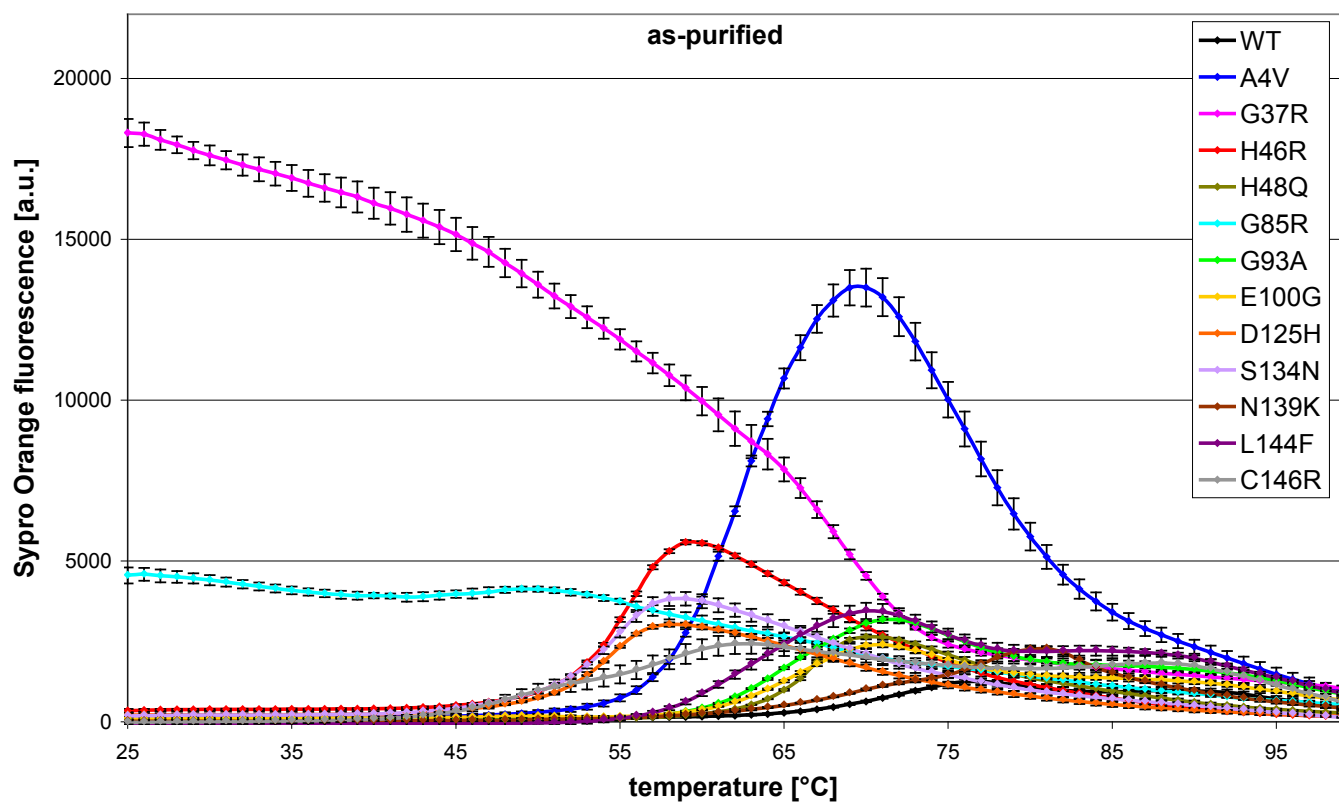

(b)

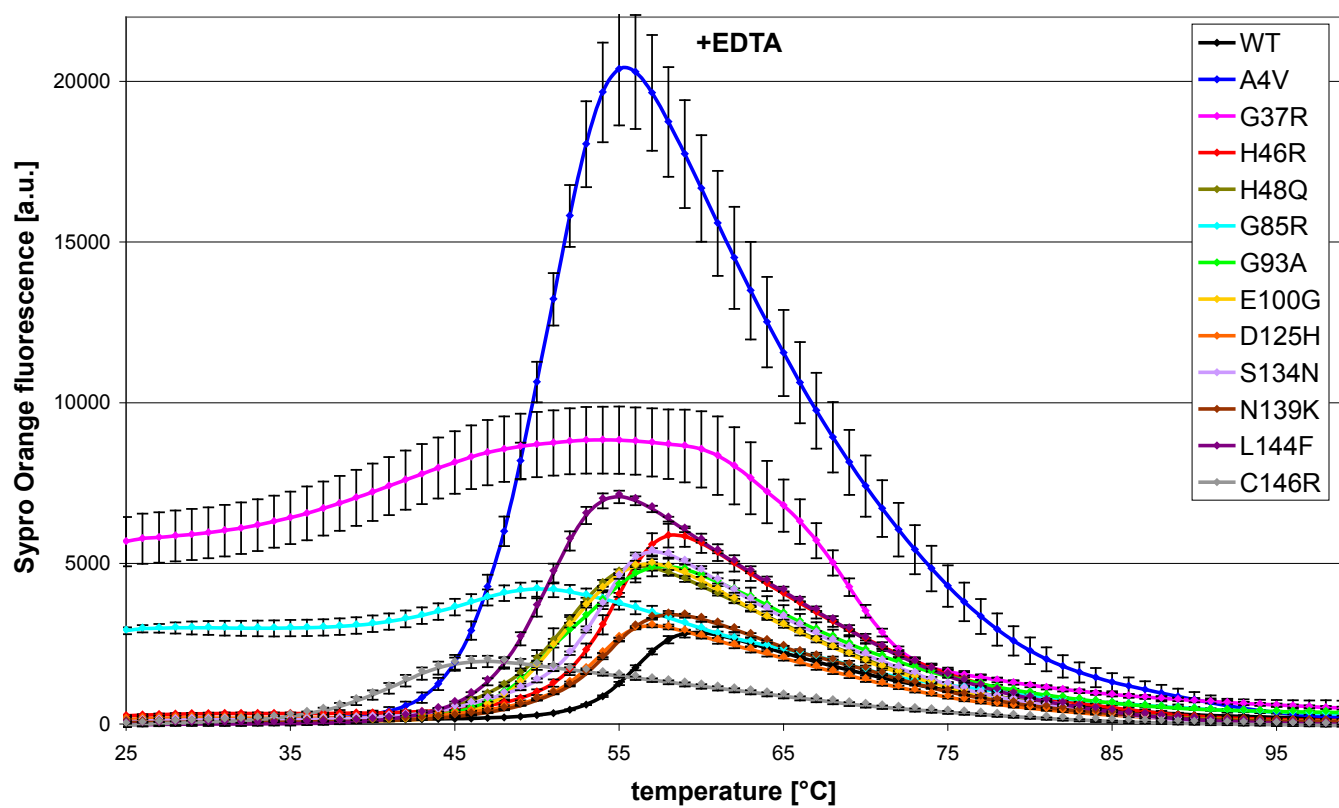

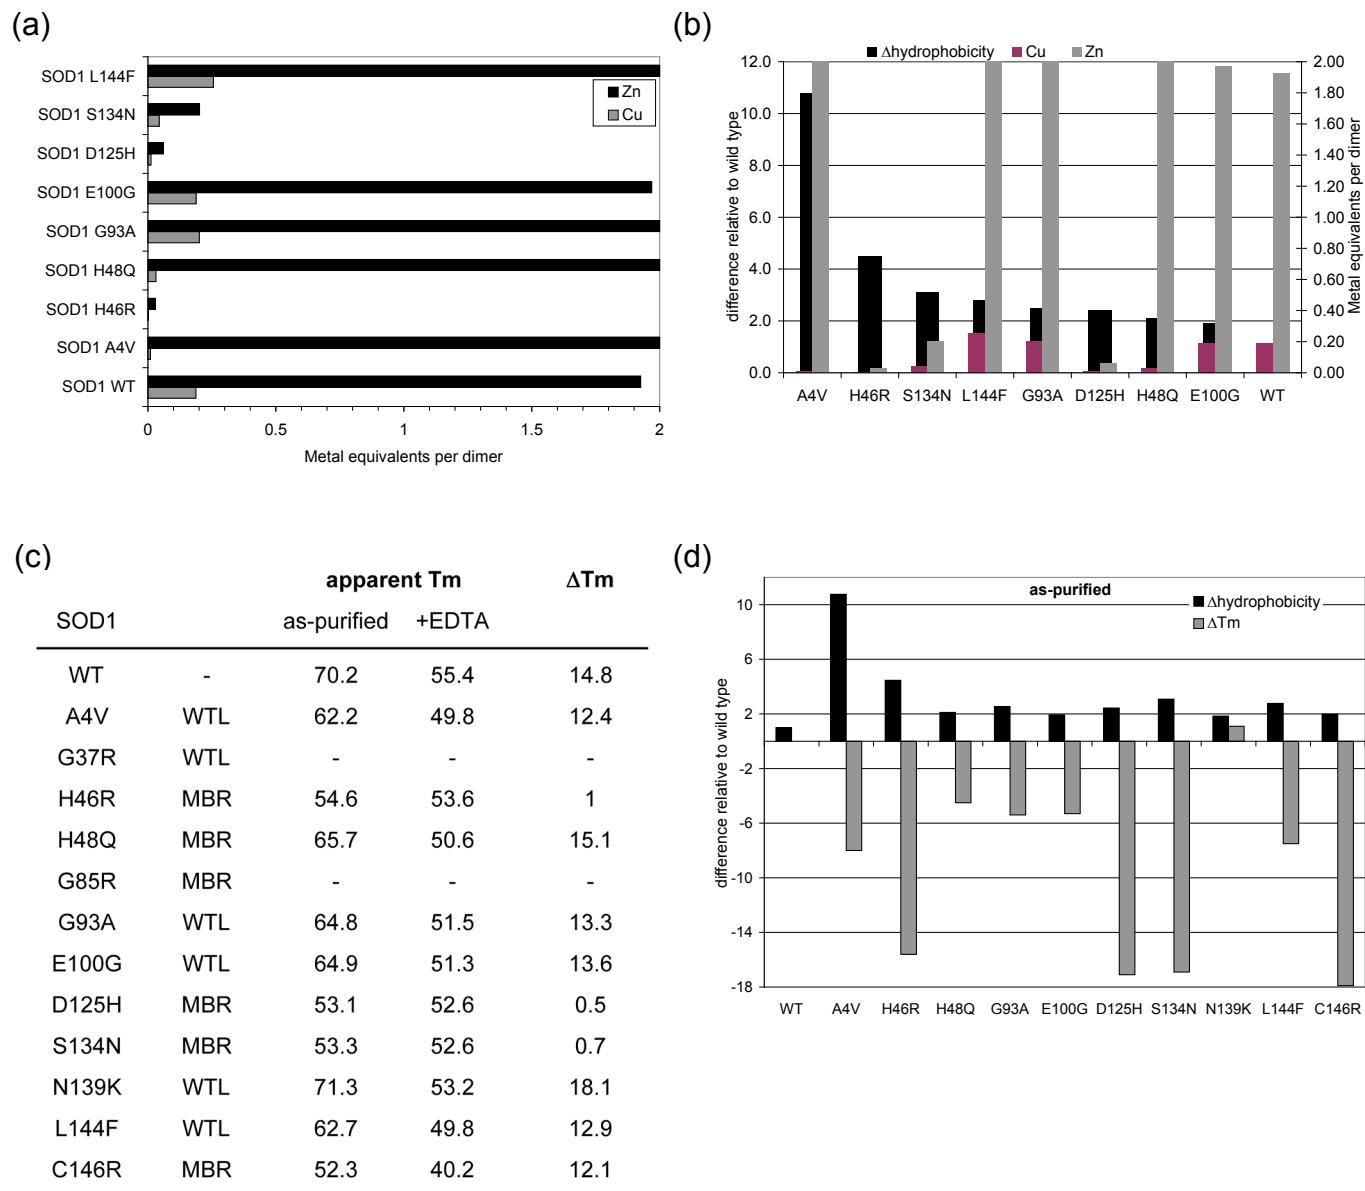

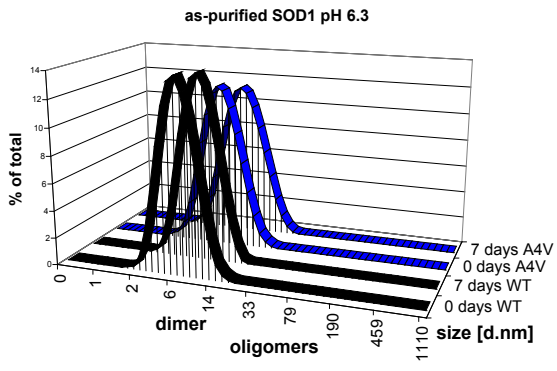

(a)

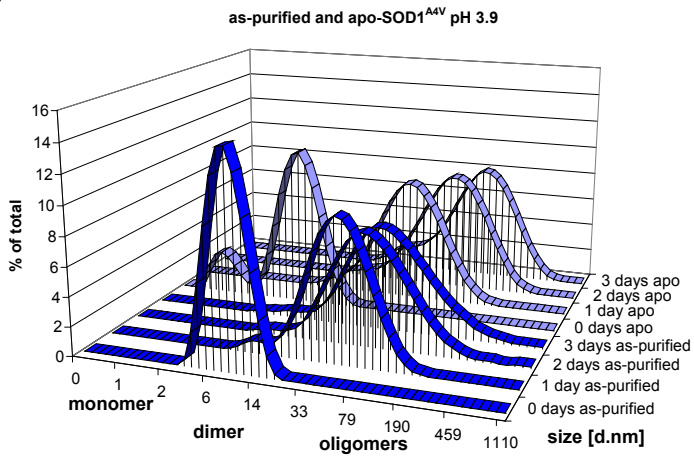

(b)

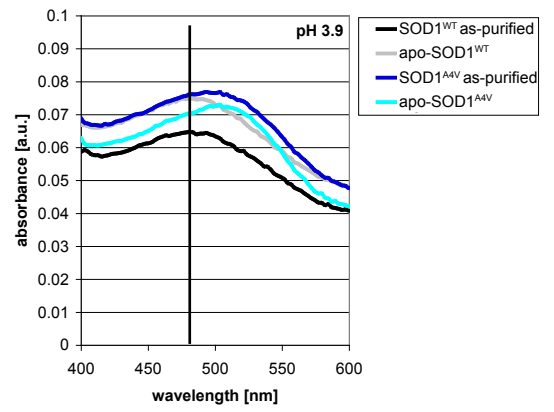

(c)

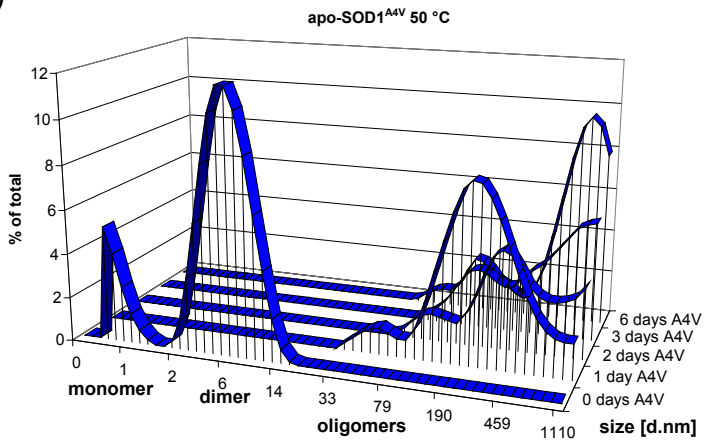

(d)

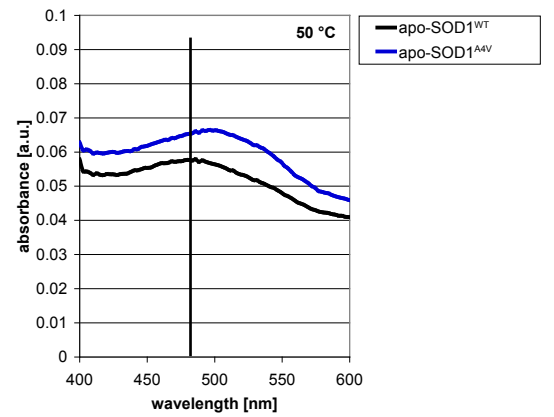

(a)

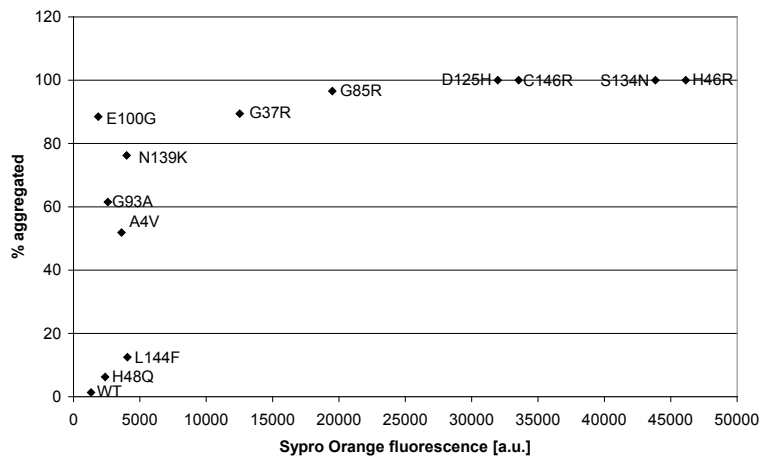

(b)

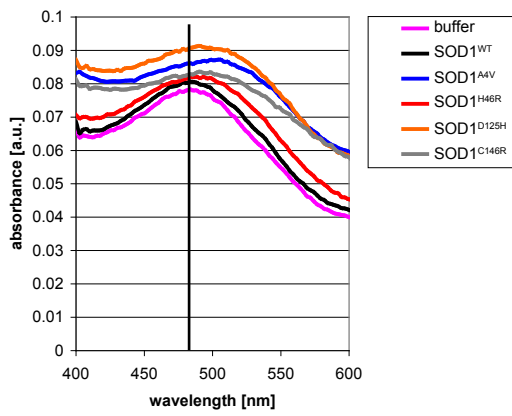

Supplement: mmc2.pdf [file mmc2.pdf]
